# Supplementary material for: Comparison of ground-based and satellite measurements of water vapour vertical profiles over Ellesmere Island, Nunavut
Source: Copernicus journal article supplement (doi:10.5194/amt-12-4039-2019), 2019-07-23
Supplement: Supplementary file 2 [file amt-12-4039-2019-supplement.zip]

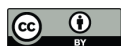

## *Supplement of*

# **Comparison of ground-based and satellite measurements of water vapour vertical profiles over Ellesmere Island, Nunavut**

**Dan Weaver et al.**

*Correspondence to:* Dan Weaver ([dan.weaver@utoronto.ca](mailto:dan.weaver@utoronto.ca))

- [amt-12-4039-2019-supplement-title-page.pdf](#)
- [Fig S1 - 125HR vs Sats at 8 km.pdf](#)
- [Fig S2 - RS\\_ACE\\_profile\\_summary\\_diffs.pdf](#)
- [Fig S3 - sats vs RS at 6km.pdf](#)
- [Fig S4 - RS vs Sats at 8 km.pdf](#)
- [Fig S5 - RS vs Sats at 12 km.pdf](#)
- [Fig S6 - all\\_coinc\\_125HR\\_12-Mar-2008.pdf](#)
- [Fig S7 - all\\_coinc\\_RS\\_09-Mar-2014.pdf](#)
- [Table S1 - summary - Satvs125HR - all matches \(v8\).pdf](#)
- [Table S2 - summary - SatvsRS - all matches \(v8\).pdf](#)

The copyright of individual parts of the supplement might differ from the CC BY 4.0 License.
