# Supplementary material for: Comparison of ground-based and satellite measurements of water vapour vertical profiles over Ellesmere Island, Nunavut
Source: Copernicus journal article supplement (doi:10.5194/amt-12-4039-2019), 2019-07-23
Supplement: Supplementary file 4 [file amt-12-4039-2019-supplement.zip]

| Instrument<br>(retrieval version) | Altitude<br>[km] | N      | Mean<br>difference $\pm$<br>SEM [ppmv] | $\sigma$<br>[ppmv] | Median<br>difference<br>[ppmv] | Mean<br>difference $\pm$<br>SEM [%] | $\sigma$<br>[%] | Median<br>difference<br>[%] |
|-----------------------------------|------------------|--------|----------------------------------------|--------------------|--------------------------------|-------------------------------------|-----------------|-----------------------------|
| ACE-FTS<br>(v3.6)                 | 6.4              | 48     | $-14.2 \pm 5.6$                        | 38.7               | -7.7                           | $-7.6 \pm 4.7$                      | 32.3            | -12.5                       |
|                                   | 8.0              | 129    | $-2.1 \pm 1.8$                         | 19.9               | -4.5                           | $+0.0 \pm 4.3$                      | 49.2            | -12.2                       |
|                                   | 9.8              | 170    | $-0.2 \pm 0.3$                         | 3.8                | -0.6                           | $+0.0 \pm 2.7$                      | 35.1            | -6.1                        |
|                                   | 12.0             | 193    | $+0.2 \pm 0.1$                         | 1.0                | +0.0                           | $+4.5 \pm 1.8$                      | 25.8            | +1.3                        |
| ACE-MAESTRO<br>(v30)              | 6.4              | 45     | $-38.3 \pm 13.2$                       | 88.9               | -42.2                          | $-21.8 \pm 12.8$                    | 86.1            | -48.2                       |
|                                   | 8.0              | 54     | $-14.5 \pm 5.4$                        | 39.8               | -16.4                          | $-17.25 \pm 13.3$                   | 98.0            | -43.8                       |
|                                   | 9.8              | 62     | $-3.9 \pm 1.1$                         | 8.9                | -4.4                           | $-20.9 \pm 79.8$                    | 79.8            | -38.6                       |
|                                   | 12.0             | 65     | $-1.0 \pm 0.2$                         | 2.0                | -1.1                           | $-19.1 \pm 6.7$                     | 54.0            | -27.6                       |
| AIRS<br>(v6)                      | 3.0              | 59430  | $-115.3 \pm 1.3$                       | 327.5              | -73.3                          | $-6.4 \pm 0.1$                      | 29.5            | -10.8                       |
|                                   | 6.4              | 123776 | $-10.9 \pm 0.3$                        | 103.8              | -14.2                          | $-2.4 \pm 0.1$                      | 42.1            | -10.0                       |
|                                   | 8.0              | 194619 | $-11.2 \pm 0.1$                        | 56.7               | -6.7                           | $-3.0 \pm 0.1$                      | 38.0            | -9.6                        |
|                                   | 9.8              | 349484 | $-3.2 \pm 0.0$                         | 12.2               | -1.9                           | $-4.3 \pm 0.0$                      | 32.1            | -9.5                        |
|                                   | 12.0             | 385786 | $-0.2 \pm 0.0$                         | 1.9                | -0.1                           | $-1.1 \pm 0.0$                      | 24.1            | -1.7                        |
| MIPAS<br>(IMK v5)                 | 6.4              | 72     | $-38.1 \pm 6.5$                        | 55.1               | -25.6                          | $-25.6 \pm 3.6$                     | 30.7            | -26.7                       |
|                                   | 8.0              | 291    | $-17.4 \pm 2.3$                        | 38.9               | -9.9                           | $-20.6 \pm 1.7$                     | 28.5            | -24.6                       |
|                                   | 9.8              | 2169   | $-3.9 \pm 0.2$                         | 10.1               | -2.3                           | $-9.8 \pm 0.6$                      | 30.2            | -14.2                       |
|                                   | 12.0             | 3291   | $-0.3 \pm 0.0$                         | 1.9                | -0.2                           | $-1.2 \pm 0.4$                      | 23.6            | -4.0                        |
| MIPAS<br>(IMK v7)                 | 6.4              | 95     | $-48.3 \pm 6.3$                        | 61.2               | -26.4                          | $-29.3 \pm 2.9$                     | 28.0            | -27.8                       |
|                                   | 8.0              | 299    | $-18.6 \pm 2.3$                        | 39.6               | -9.9                           | $-21.5 \pm 1.6$                     | 28.2            | -24.9                       |
|                                   | 9.8              | 2278   | $-4.2 \pm 0.2$                         | 10.5               | -2.3                           | $-10.0 \pm 0.6$                     | 30.0            | -14.1                       |
|                                   | 12.0             | 3306   | $-0.3 \pm 0.0$                         | 1.9                | -0.2                           | $-1.1 \pm 0.4$                      | 23.7            | -3.8                        |
| MLS<br>(v4.2)                     | 8.0              | 88     | $-13.3 \pm 1.0$                        | 9.5                | -11.6                          | $-31.3 \pm 1.3$                     | 12.0            | -31.0                       |
|                                   | 9.8              | 25467  | $-5.0 \pm 0.1$                         | 12.0               | -3.4                           | $-12.6 \pm 0.2$                     | 29.6            | -17.2                       |
|                                   | 12.0             | 25475  | $-0.5 \pm 0.0$                         | 1.9                | -0.4                           | $-4.9 \pm 0.1$                      | 22.8            | -7.9                        |
| SCIAMACHY<br>(IUP v3.01)          | 12.0             | 1520   | $-0.3 \pm 0.0$                         | 1.8                | -0.4                           | $-3.8 \pm 0.7$                      | 26.8            | -9.1                        |
| SCIAMACHY<br>(IUP v4.2)           | 12.0             | 11735  | $-0.3 \pm 0.0$                         | 1.4                | -0.4                           | $-5.2 \pm 0.2$                      | 21.8            | -7.5                        |
| TES<br>(v6)                       | 3.0              | 3218   | $-35.9 \pm 16.1$                       | 913.6              | -15.1                          | $+4.2 \pm 0.8$                      | 42.6            | -1.0                        |
|                                   | 6.4              | 3218   | $+86.4 \pm 5.2$                        | 292.5              | +45.4                          | $+27.2 \pm 1.2$                     | 67.2            | +13.1                       |
|                                   | 8.0              | 3218   | $+34.3 \pm 2.0$                        | 112.8              | +27.4                          | $+29.0 \pm 1.2$                     | 66.4            | +18.8                       |
|                                   | 9.8              | 3218   | $+6.9 \pm 0.4$                         | 20.5               | +6.2                           | $+26.0 \pm 0.9$                     | 53.6            | +19.5                       |
|                                   | 12.0             | 3218   | $+1.5 \pm 0.0$                         | 3.1                | +1.5                           | $+22.8 \pm 0.6$                     | 36.3            | +20.2                       |
