# Supplementary material for: Comparison of ground-based and satellite measurements of water vapour vertical profiles over Ellesmere Island, Nunavut
Source: Copernicus journal article supplement (doi:10.5194/amt-12-4039-2019), 2019-07-23
Supplement: Supplementary file 5 [file amt-12-4039-2019-supplement.zip]

| Instrument<br>(retrieval version) | Altitude<br>[km] | N      | Mean difference<br>± SEM [ppmv] | $\sigma$<br>[ppmv] | Median<br>difference<br>[ppmv] | Mean<br>difference ±<br>SEM [%] | $\sigma$<br>[%] | Median<br>difference<br>[%] |
|-----------------------------------|------------------|--------|---------------------------------|--------------------|--------------------------------|---------------------------------|-----------------|-----------------------------|
| ACE-FTS<br>(v3.6)                 | 6.0              | 62     | $-8.9 \pm 12.0$                 | 94.8               | +12.8                          | $+29.2 \pm 10.7$                | 84.6            | +9.7                        |
|                                   | 8.0              | 103    | $+0.3 \pm 3.4$                  | 34.6               | +3.3                           | $+3.5 \pm 7.4$                  | 75.7            | +7.0                        |
|                                   | 10.0             | 60     | $-5.0 \pm 1.7$                  | 13.1               | -0.6                           | $-9.8 \pm 6.0$                  | 46.3            | -4.9                        |
|                                   | 12.0             | 22     | $+1.2 \pm 0.3$                  | 1.5                | +1.7                           | $+32.4 \pm 5.9$                 | 27.8            | +34.6                       |
| ACE-MAESTRO<br>(v30)              | 6.0              | 62     | $-56.1 \pm 32.3$                | 254.7              | -24.6                          | $+27.0 \pm 24.8$                | 171.2           | -23.4                       |
|                                   | 8.0              | 100    | $-13.3 \pm 8.1$                 | 80.8               | -10.9                          | $-4.3 \pm 9.0$                  | 90.0            | -33.7                       |
|                                   | 10.0             | 43     | $-2.0 \pm 3.1$                  | 20.2               | -1.2                           | $-4.8 \pm 10.5$                 | 68.9            | -12.8                       |
|                                   | 12.0             | 13     | $-1.1 \pm 0.6$                  | 2.0                | -1.9                           | $-30.7 \pm 11.0$                | 39.7            | -42.4                       |
| AIRS<br>(v6)                      | 3.0              | 72491  | $-72.9 \pm 1.8$                 | 478.4              | -56.1                          | $+6.4 \pm 0.2$                  | 56.0            | -6.9                        |
|                                   | 6.0              | 182139 | $-12.9 \pm 0.3$                 | 118.8              | -3.6                           | $+10.3 \pm 0.1$                 | 61.7            | -2.7                        |
|                                   | 8.0              | 246376 | $+3.5 \pm 0.1$                  | 47.7               | +3.1                           | $+16.4 \pm 0.1$                 | 51.5            | +7.2                        |
|                                   | 10.0             | 40752  | $-8.4 \pm 0.0$                  | 17.5               | -2.5                           | $-9.3 \pm 0.1$                  | 30.9            | -12.0                       |
|                                   | 12.0             | 9476   | $-2.0 \pm 0.1$                  | 9.2                | +0.4                           | $+6.9 \pm 0.3$                  | 30.3            | +8.7                        |
| MLS<br>(v4.2)                     | 8.0              | 136    | $-29.1 \pm 8.0$                 | 93.4               | -6.3                           | $-18.5 \pm 4.5$                 | 52.0            | -29.4                       |
|                                   | 10.0             | 6164   | $-7.4 \pm 0.3$                  | 26.3               | -4.0                           | $-27.1 \pm 0.4$                 | 33.7            | -31.2                       |
|                                   | 12.0             | 683    | $-2.7 \pm 0.3$                  | 9.0                | -0.1                           | $-6.1 \pm 1.0$                  | 27.1            | -2.2                        |
