# Supplementary figures and images for: Comparison of ground-based and satellite measurements of water vapour vertical profiles over Ellesmere Island, Nunavut
Source: Copernicus journal article supplement (doi:10.5194/amt-12-4039-2019), 2019-07-23

March 12, 2008

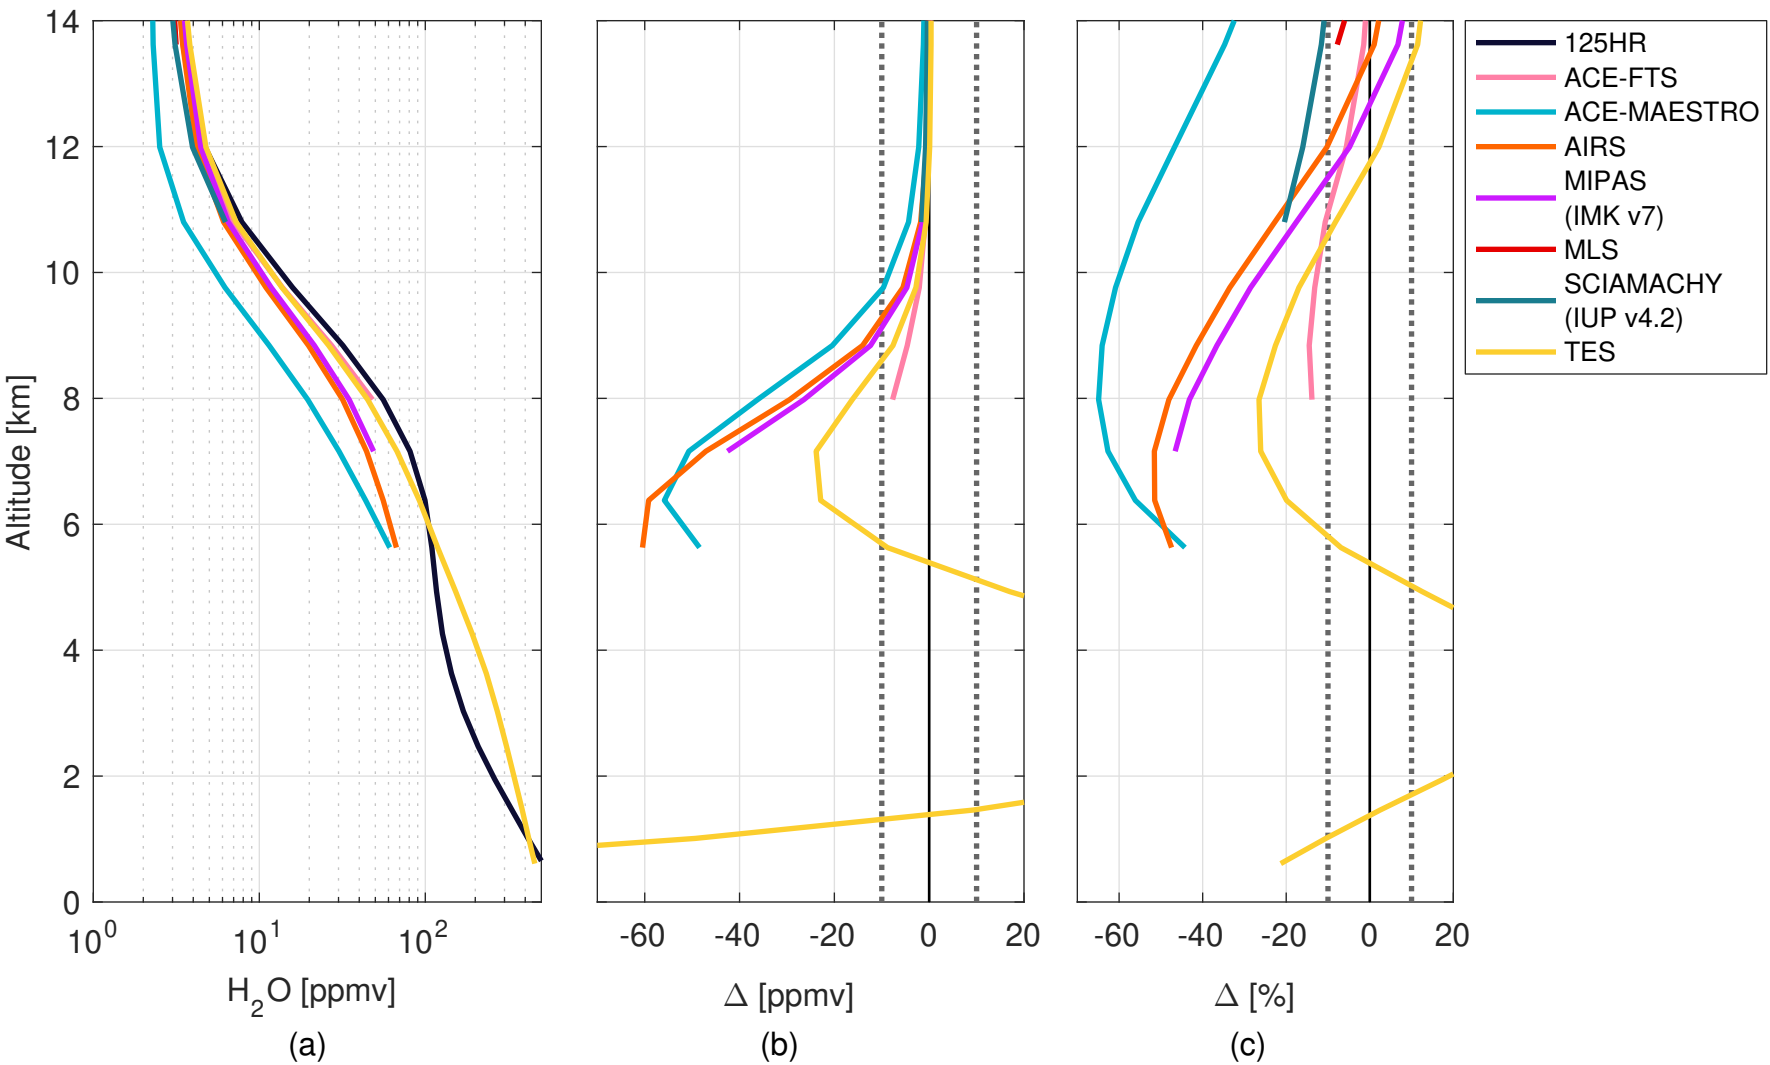

Supplement: Supplementary file 1 [file amt-12-4039-2019-supplement.zip]

March 09, 2014

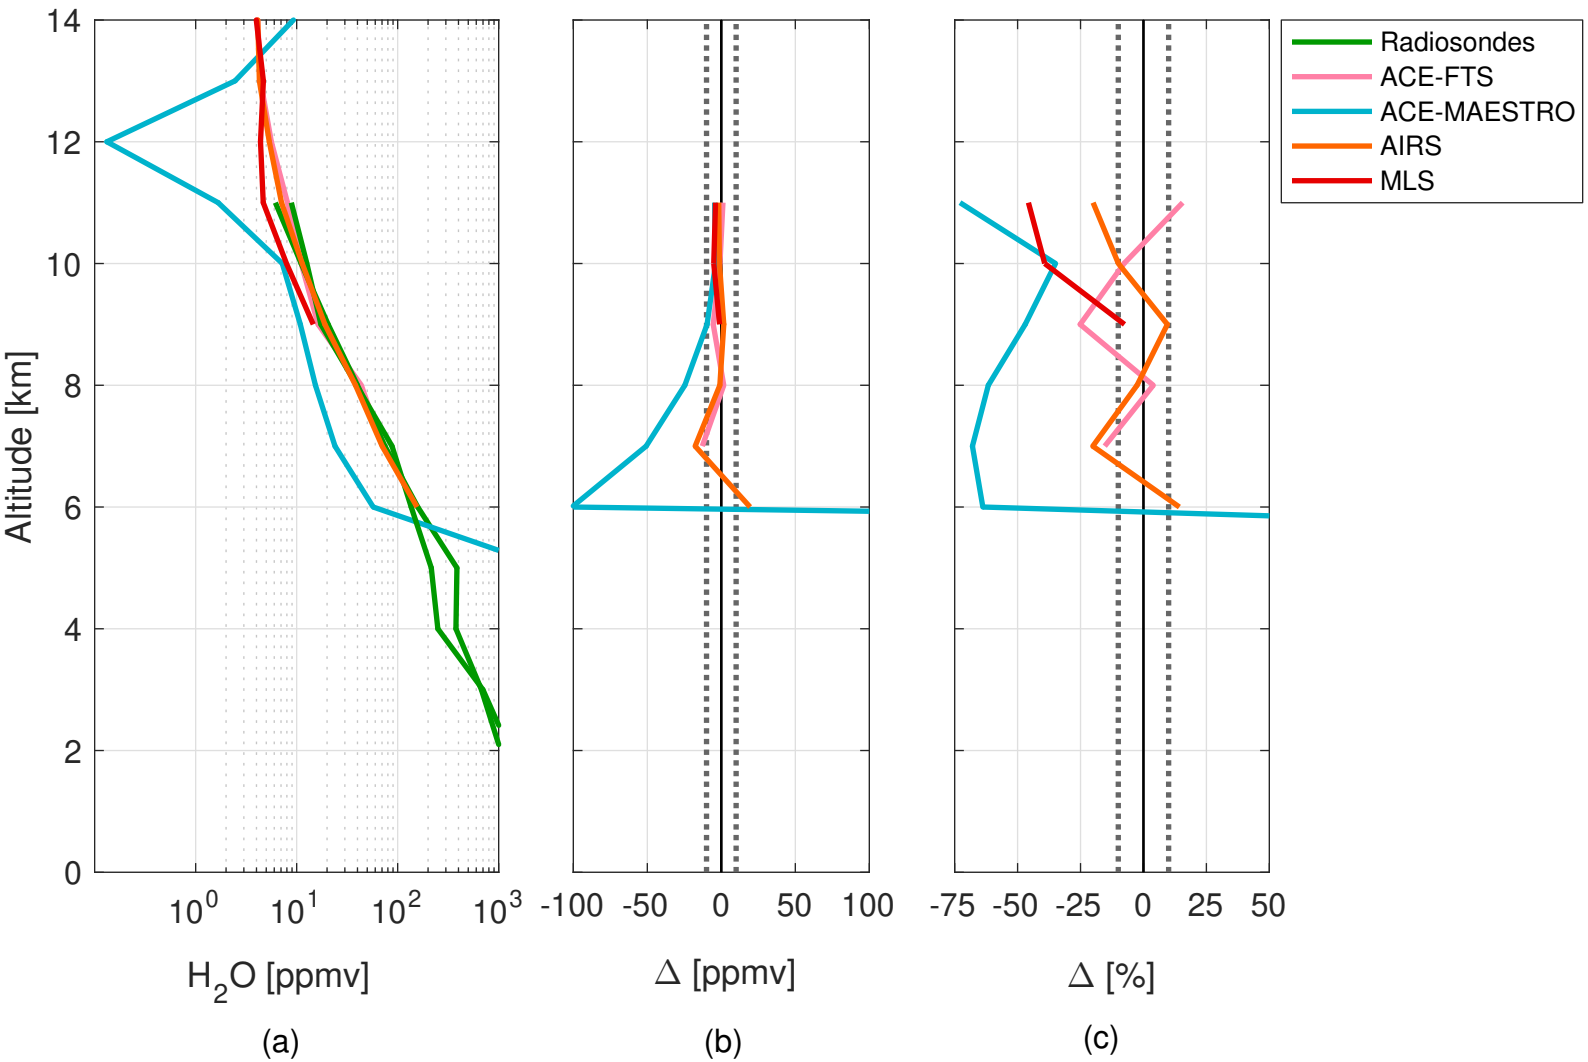

Supplement: Supplementary file 3 [file amt-12-4039-2019-supplement.zip]
